# Supplementary material
Source: MDPI journal article supplement (https://www.mdpi.com/1422-0067/23/24/16090)
Supplement: s1 [file s1]

Archive with 1 entries (1 files):
- ijms-2075176-supplementary - updated.pdf
